# Supplementary material
Source: Springer Nature journal article supplement (https://www.springermedizin.de/resource/supplementary/12965_2009_75_MOESM7_ESM.pdf/9573066)

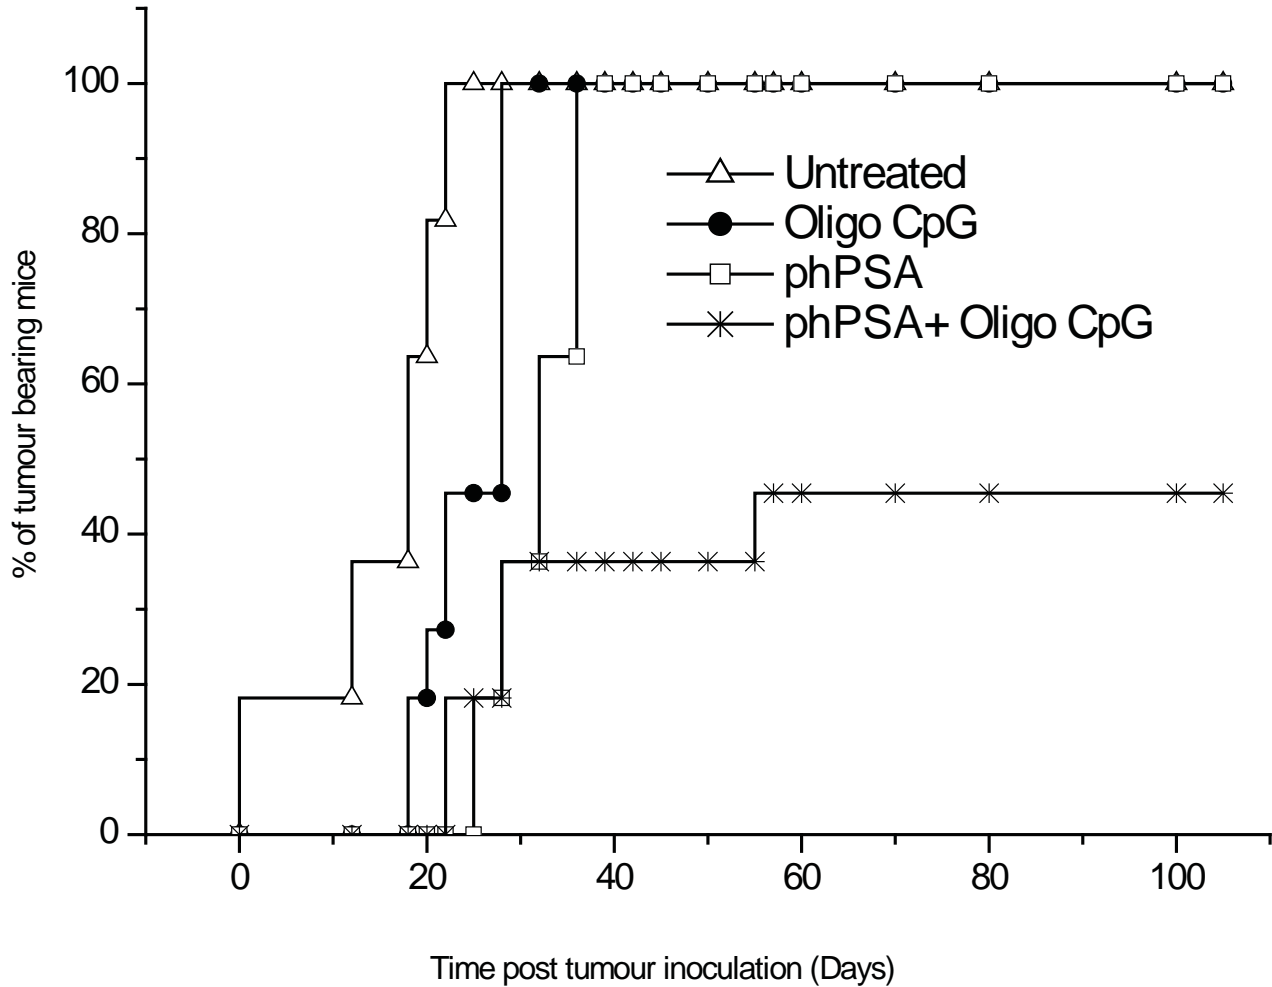

Supplement: MOESM7 [file 9573066]
